# Supplementary material for: LIR Motif-Containing Hyperdisulfide β-Ginkgotide is Cytoprotective, Adaptogenic, and Scaffold-Ready
Source: MDPI journal article supplement (doi:10.3390/molecules24132417), 2019-06-30
Supplement: s1 [file s1]

Supplementary materials for

# LIR Motif-Containing Hyperdisulfide $\beta$ -Ginkgotide is Cytoprotective, Adaptogenic and Scaffold-Ready

Bamaprasad Dutta<sup>†</sup>, Jiayi Huang<sup>†</sup>, Janet To and James P Tam<sup>\*</sup>

School of Biological Sciences, Nanyang Technological University, 60 Nanyang Drive, Singapore 637551

<sup>\*</sup>Correspondence: [jptam@ntu.edu.sg](mailto:jptam@ntu.edu.sg); Tel: +65-6316 2833

<sup>†</sup> These authors contributed equally to this work.

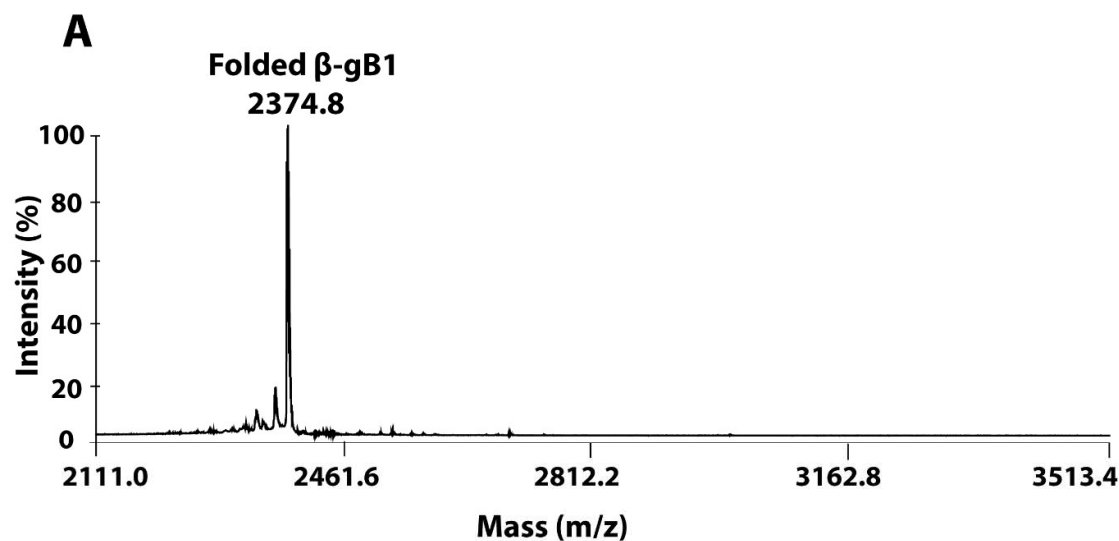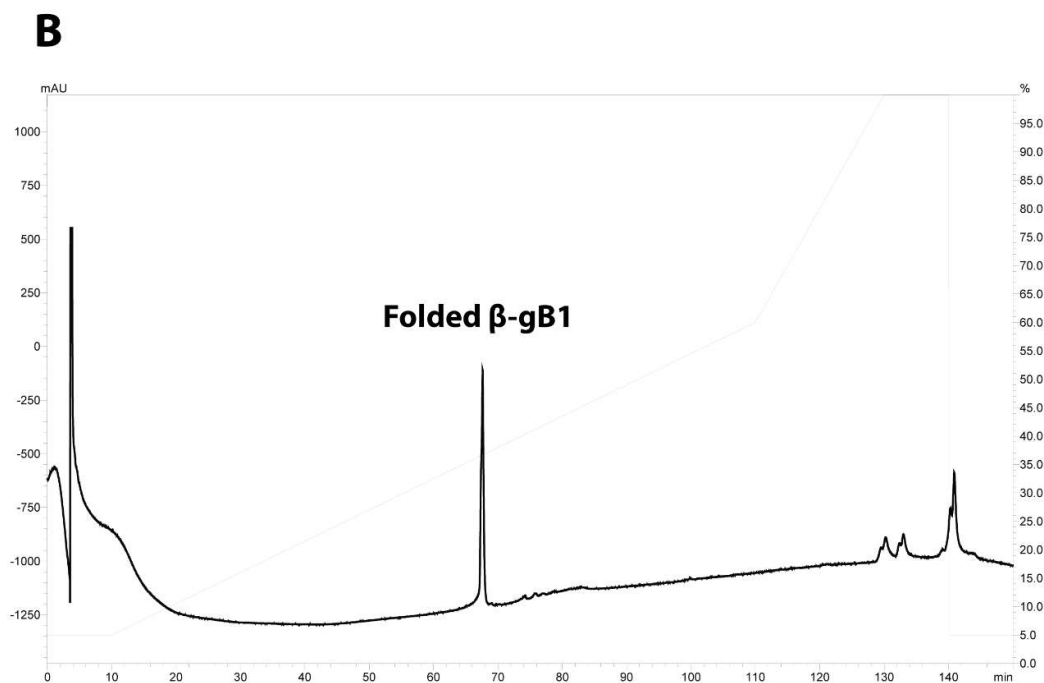

Figure S1. Mass spectrometry and HPLC Spectrum of folded  $\beta$ -gB1. (A) MS spectra of folded  $\beta$ -gB1. (B) HPLC chromatogram of folded  $\beta$ -gB1.

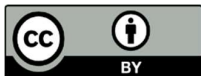

© 2019 by the authors. Submitted for possible open access publication under the terms and conditions of the Creative Commons Attribution (CC BY) license (<http://creativecommons.org/licenses/by/4.0/>).
